# Supplementary material
Source: PubMed Central journal article supplement (PMC8522799)
Supplement: NEJMoa2114114_appendix.pdf [file NEJMoa2114114_appendix.pdf]

## Supplementary Appendix

This appendix has been provided by the authors to give readers additional information about their work.

Supplement to: Chemaitelly H, Tang P, Hasan MR, et al. Waning of BNT162b2 vaccine protection against SARS-CoV-2 infection in Qatar. *N Engl J Med*. DOI: 10.1056/NEJMoa2114114

## Supplementary Appendix

### Table of Contents

|                                                                                                                                                                                                                                                                                                                                                                                                                   |    |
|-------------------------------------------------------------------------------------------------------------------------------------------------------------------------------------------------------------------------------------------------------------------------------------------------------------------------------------------------------------------------------------------------------------------|----|
| Author contributions .....                                                                                                                                                                                                                                                                                                                                                                                        | 3  |
| Section 1. Further details on methods.....                                                                                                                                                                                                                                                                                                                                                                        | 4  |
| Study population, data sources, and study design .....                                                                                                                                                                                                                                                                                                                                                            | 4  |
| Statistical analysis .....                                                                                                                                                                                                                                                                                                                                                                                        | 5  |
| Section 2. COVID-19 severity, criticality, and fatality classification .....                                                                                                                                                                                                                                                                                                                                      | 8  |
| Section 3. Laboratory methods .....                                                                                                                                                                                                                                                                                                                                                                               | 9  |
| Section 4. Classification of infections by variant type .....                                                                                                                                                                                                                                                                                                                                                     | 10 |
| Section 5. Additional sensitivity analyses.....                                                                                                                                                                                                                                                                                                                                                                   | 12 |
| Table S1. STROBE checklist for case-control studies. ....                                                                                                                                                                                                                                                                                                                                                         | 14 |
| Figure S1. A) Number of BNT162b2 vaccinations by calendar month. B) Number of PCR-positive cases by calendar month that were included in the analyses of this study. ....                                                                                                                                                                                                                                         | 15 |
| Figure S2. Flowchart describing the population selection process for investigating BNT162b2 vaccine effectiveness.....                                                                                                                                                                                                                                                                                            | 16 |
| Table S2. Demographic characteristics of subjects and reasons for PCR testing among samples used to estimate BNT162b2 vaccine effectiveness. The table includes samples used in the 2 <sup>nd</sup> -month-after-second-dose analysis, 3 <sup>rd</sup> -month-after-second-dose analysis, and 4 <sup>th</sup> -month-after-second-dose analysis.....                                                              | 17 |
| Table S3. Demographic characteristics of subjects and reasons for PCR testing among samples used to estimate BNT162b2 vaccine effectiveness. The table includes samples used in the 5 <sup>th</sup> -month-after-second-dose analysis, 6 <sup>th</sup> -month-after-second-dose analysis, and 7 <sup>th</sup> -month-after-second-dose analysis.....                                                              | 18 |
| Table S4. Effectiveness of the BNT162b2 vaccine against any SARS-CoV-2 infection and against any severe, critical, or fatal COVID-19 disease, stratified by age (<60 years or ≥60 years). ....                                                                                                                                                                                                                    | 19 |
| Table S5. Effectiveness of the BNT162b2 vaccine against each of SARS-CoV-2 Alpha <sup>12</sup> (B.1.1.7), Beta <sup>12</sup> (B.1.351), and Delta <sup>12</sup> (B.1.617.2) variant infections.....                                                                                                                                                                                                               | 21 |
| Table S6. Effectiveness of the BNT162b2 vaccine against each of severe COVID-19 disease, critical COVID-19 disease, and fatal COVID-19 disease. ....                                                                                                                                                                                                                                                              | 22 |
| Table S7. Sensitivity analysis in which study inclusion and exclusion criteria were modified so as to additionally exclude any case or control with a prior infection, that is any person with a PCR-positive test prior to January 1, 2021, the first day of the study. Effectiveness of the BNT162b2 vaccine against any SARS-CoV-2 infection and against any severe, critical, or fatal COVID-19 disease. .... | 23 |
| Table S8. Sensitivity analysis in which study inclusion and exclusion criteria were modified so as to include all PCR-positive and PCR-negative tests for each person, and regardless of the number of PCR-positive or PCR-negative tests each person had during the study, January 1, 2021 to September 5, 2021. Effectiveness of the BNT162b2 vaccine against any SARS-CoV-2 infection and                      |    |

against any severe, critical, or fatal COVID-19 disease. This analysis appears to have been affected by a positive bias due to perhaps inclusion of repeat testing, such as more “repeat testers” among controls, that is persons with a higher level of health care-seeking behavior and presumably lower risk of infection. This can be seen in the results for vaccine effectiveness at 0-13 days after the first dose. Based on evidence from the clinical trials and biological plausibility, it is not expected to observe a positive effectiveness against specifically *infection* in the first two weeks after the first dose, but the analysis indicated a small statistically significant positive effectiveness. .... 24

Table S9. Sensitivity analysis in which study inclusion and exclusion criteria were modified so as to additionally include as controls persons who had a PCR-negative test during the study, in addition to their PCR-positive test during the study. That is, persons with both PCR-positive and PCR-negative tests during the study, January 1, 2021 to September 5, 2021, were included both as cases and as controls, but at different time points. Effectiveness of the BNT162b2 vaccine against any SARS-CoV-2 infection and against any severe, critical, or fatal COVID-19 disease..... 25

Table S10. Sensitivity analysis in which study inclusion and exclusion criteria were modified so as to additionally include all PCR testing done for pre-travel or at port of entry purposes. Effectiveness of the BNT162b2 vaccine against any SARS-CoV-2 infection and against any severe, critical, or fatal COVID-19 disease. Inclusion of this testing appears to introduce a negative bias, possibly because this testing could have been affected by different test-seeking behaviors of those vaccinated versus those unvaccinated, as a consequence of the travel privileges granted only to vaccinated persons, such as exemption from quarantine. This bias specifically affected the time-since-vaccination estimates of  $\geq 5$  months after the second dose, as incidence in these time-since-vaccination categories coincided with the summer travel season. .... 26

Table S11. Effectiveness of the BNT162b2 vaccine against any SARS-CoV-2 infection, symptomatic SARS-CoV-2 infection, or asymptomatic SARS-CoV-2 infection, with effectiveness estimated using a multivariable logistic regression analysis of associations with a PCR-positive test, January 1, 2021 to September 5, 2021, adjusting for sex, age, nationality, reason for PCR testing, and calendar week of PCR test\* ..... 27

References..... 28

## **Author contributions**

HC co-designed the study, performed the statistical analyses, and co-wrote the first draft of the article. LJA conceived and co-designed the study, led the statistical analyses, and co-wrote the first draft of the article. PT and MRH conducted the multiplex, RT-qPCR variant screening and viral genome sequencing. HY, FMB, and HAK conducted viral genome sequencing. All authors contributed to data collection and acquisition, database development, discussion and interpretation of the results, and to the writing of the manuscript. All authors have read and approved the final manuscript.

## **Section 1. Further details on methods**

### **Study population, data sources, and study design**

Every PCR test conducted in Qatar, regardless of location or setting, is classified on the basis of symptoms and the reason for testing (clinical symptoms, contact tracing, surveys or random testing campaigns, individual requests, routine healthcare testing, pre-travel, at port of entry, or other). Qatar has unusually young, diverse demographics, in that only 9% of its residents are  $\geq 50$  years of age, and 89% are expatriates from over 150 countries.<sup>1,2</sup>

Nearly all individuals in the population were vaccinated free of charge in Qatar, rather than elsewhere. In rare situations in which an individual was vaccinated outside Qatar, that individual's vaccination details were still recorded in the health system at the port of entry upon return to Qatar, following national requirements and to benefit from privileges associated with vaccination, such as exemption from quarantine.<sup>3</sup>

With the high diversity of our population and having several fold more PCR-negative tests than PCR-positive tests, it was possible to find exact PCR-negative matches for the PCR-positive cases in this study, especially for the major nationality groups in Qatar.

Only the first PCR-positive test during the study, January 1, 2021 to September 5, 2021, was included for each case, and only the first PCR-negative test during the study was included for each control. All PCR tests done for pre-travel or at the port of entry were excluded from analysis, except in a sensitivity analysis. This type of testing could possibly be affected by different test-seeking behaviors in those vaccinated versus those unvaccinated, as a consequence of the travel privileges granted only to vaccinated persons, such as exemption from quarantine.<sup>3</sup>

All PCR-negative tests for persons included as cases were excluded from analysis. That is, no person was included as both a case and a control. These inclusion and exclusion criteria were implemented to control potential bias arising from repeated testing, such as a PCR-positive person undergoing a second PCR test a few days after infection diagnosis to test for clearance of infection, or bias arising from repeat testers among controls, that is persons with a higher level of health care-seeking behavior and presumably lower risk of infection. Modifications to these inclusion and exclusion criteria were investigated in sensitivity analyses.

Each person who had a positive PCR test result and hospital admission was subject to an infection severity assessment every three days until discharge or death, regardless of the length of stay in the hospital or time between PCR-positive test and final disease outcome. Individuals who progressed to COVID-19 disease between the time of the PCR-positive test result and the end of the study were classified based on their worst outcome, starting with death,<sup>4</sup> followed by critical disease,<sup>5</sup> and then severe disease.<sup>5</sup> Details of the COVID-19 severity, criticality, and fatality classification are found in Section 2.

All records of PCR testing for those vaccinated and unvaccinated during the study were examined. All persons who received mixed vaccines, or who received a vaccine other than BNT162b2 were excluded. Every case that met the inclusion criteria and that could be matched to a control was included in the analysis. Both PCR-test outcomes and vaccination status were ascertained at the time of the PCR test.

### **Statistical analysis**

All records of PCR testing in Qatar during the study were examined, but only samples of matched cases and controls were included in the analysis. In each analysis for a specific time-

since-vaccination stratum, we included only those vaccinated in that specific time-since-vaccination stratum and those unvaccinated (our reference group). Only matched pairs of PCR-positive and PCR-negative persons, in which both members of the pair were either unvaccinated or fell within each time-since-vaccination stratum were included in the corresponding vaccine effectiveness estimate. Thus, the number of cases (and controls) varied across time-since-vaccination analyses. Effectiveness after the second dose was estimated month by month, where one month was defined as 30 days.

The analysis adjusting in conditional logistic regression for healthcare worker status specifically adjusted for being a healthcare worker at Hamad Medical Corporation, the main public healthcare provider in Qatar and the nationally designated provider for all COVID-19 healthcare needs.

Vaccine effectiveness was estimated against symptomatic infection, defined as a PCR-positive test conducted because of clinical suspicion due to presence of symptoms compatible with a respiratory tract infection, and against asymptomatic infection, defined as a PCR-positive test conducted with no reported presence of symptoms compatible with a respiratory tract infection. In the latter case, PCR testing was done strictly as part of a survey or a random testing campaign. Vaccine effectiveness was further estimated in subgroup analyses stratifying cases and controls by age, variant type, or severe forms of COVID-19 disease.

Vaccine effectiveness estimates for individual variants had wider 95% CIs, because they were derived using smaller numbers of confirmed PCR-positive cases, that is, only those confirmed as Alpha, Beta, or Delta using RT-qPCR genotyping (Section 4). Variant RT-qPCR genotyping started at a considerable scale only in the early summer of 2021, well after the large Beta wave had peaked in April, 2021, thus explaining the small sample sizes in these analyses.

Although Qatar experienced an Alpha variant wave early in 2021, this wave peaked in the first week of March, 2021, and at a much lower incidence than the peak of the Beta variant wave, which occurred in early of April, 2021.<sup>6-10</sup> Most incidence of Alpha occurred at a time when the number of vaccinated persons was still small; thus, Alpha infections did not contribute appreciably to the estimated effectiveness measures in this study.



## **Section 2. COVID-19 severity, criticality, and fatality classification**

Severe Coronavirus Disease 2019 (COVID-19) disease was defined per the World Health Organization (WHO) classification as a severe acute respiratory syndrome coronavirus 2 (SARS-CoV-2) infected person with “oxygen saturation of  $<90\%$  on room air, and/or respiratory rate of  $>30$  breaths/minute in adults and children  $>5$  years old (or  $\geq 60$  breaths/minute in children  $<2$  months old or  $\geq 50$  breaths/minute in children 2-11 months old or  $\geq 40$  breaths/minute in children 1–5 years old), and/or signs of severe respiratory distress (accessory muscle use and inability to complete full sentences, and, in children, very severe chest wall indrawing, grunting, central cyanosis, or presence of any other general danger signs)”.<sup>5</sup> Detailed WHO criteria for classifying SARS-CoV-2 infection severity can be found in the WHO technical report.<sup>5</sup>

Critical COVID-19 disease was defined per WHO classification as a SARS-CoV-2 infected person with “acute respiratory distress syndrome, sepsis, septic shock, or other conditions that would normally require the provision of life sustaining therapies such as mechanical ventilation (invasive or non-invasive) or vasopressor therapy”.<sup>5</sup> Detailed WHO criteria for classifying SARS-CoV-2 infection criticality can be found in the WHO technical report.<sup>5</sup>

COVID-19 death was defined per WHO classification as “a death resulting from a clinically compatible illness, in a probable or confirmed COVID-19 case, unless there is a clear alternative cause of death that cannot be related to COVID-19 disease (e.g. trauma). There should be no period of complete recovery from COVID-19 between illness and death. A death due to COVID-19 may not be attributed to another disease (e.g. cancer) and should be counted independently of preexisting conditions that are suspected of triggering a severe course of COVID-19”. Detailed WHO criteria for classifying COVID-19 death can be found in the WHO technical report.<sup>4</sup>

### **Section 3. Laboratory methods**

Nasopharyngeal and/or oropharyngeal swabs were collected for PCR testing and placed in Universal Transport Medium (UTM). Aliquots of UTM were: extracted on a QIA Symphony platform (QIAGEN, USA) and tested with real-time reverse-transcription PCR (RT-qPCR) using TaqPath™ COVID-19 Combo Kits (Thermo Fisher Scientific, USA) on an ABI 7500 FAST (Thermo Fisher, USA); tested directly on the Cepheid GeneXpert system using the Xpert Xpress SARS-CoV-2 (Cepheid, USA); or loaded directly into a Roche cobas® 6800 system and assayed with a cobas® SARS-CoV-2 Test (Roche, Switzerland). The first assay targets the viral S, N, and ORF1ab gene regions. The second targets the viral N and E-gene regions, and the third targets the ORF1ab and E-gene regions.

All PCR testing was conducted at the Hamad Medical Corporation Central Laboratory or Sidra Medicine Laboratory, following standardized protocols.

#### **Section 4. Classification of infections by variant type**

Surveillance for SARS-CoV-2 variants in Qatar is based on viral genome sequencing and multiplex, real-time reverse-transcription PCR (RT-qPCR) variant screening<sup>11</sup> of random positive clinical samples,<sup>6-10</sup> and complemented by deep sequencing of wastewater samples.<sup>6</sup> The ascertainment of the B.1.1.7 (Alpha<sup>12</sup>), B.1.351 (Beta<sup>12</sup>), and B.1.617.2 (Delta<sup>12</sup>) cases in this study was based on the results of weekly RT-qPCR genotyping of the positive clinical samples.<sup>6,8</sup>

Between March 22, 2021 and August 24, 2021, RT-qPCR genotyping identified 5,845 (38.7%) B.1.351-like cases, 3,523 (23.3%) B.1.1.7-like cases, 5,706 (37.7%) “other” variant cases, and 48 (0.3%) B.1.375-like and B.1.258-like cases in 15,175 randomly collected SARS-CoV-2-positive specimens.<sup>6,8</sup>

The accuracy of the RT-qPCR genotyping was verified against either Sanger sequencing of the receptor-binding domain (RBD) of SARS-CoV-2 surface glycoprotein (S) gene, or by viral whole-genome sequencing on a Nanopore GridION sequencing device. From 236 random samples (27 B.1.1.7-like, 186 B.1.351/P.1-like, and 23 “other” variants), the PCR genotyping results for B.1.1.7-like, B.1.351/P.1-like, and ‘other’ variants were in 88.8% (23 out of 27), 99.5% (185 out of 186), and 100% (23 out of 23) agreement with the SARS-CoV-2 lineages assigned by sequencing.<sup>6,8</sup>

Within the “other” variant category, Sanger sequencing and/or Illumina sequencing of the RBD of SARS-CoV-2 spike gene on 457 random samples confirmed that 433 (94.7%) were B.1.617.2 cases, 8 (1.8%) were B.1.617.1 cases, 3 (0.7%) were B.1 cases, 1 (0.2%) was a B.1.351/P.1 case, 1 (0.2%) was a P.1 case, and 1 (0.2%) was a B.1.617.3 case, with 10 (1.1%) samples failing

lineage assignment.<sup>6,8</sup> Accordingly, a Delta case was proxied as any “other” case identified through the RT-qPCR based variant screening.

All the variant RT-qPCR screening was conducted at the Sidra Medicine Laboratory following standardized protocols.

## **Section 5. Additional sensitivity analyses**

Additional sensitivity analyses were conducted to investigate whether the generated real-world effectiveness estimates could have been biased by an unknown factor. These analyses included:

1. Sensitivity analysis in which study inclusion and exclusion criteria were modified so as to additionally exclude any case or control with a prior infection, that is any person with a PCR-positive test prior to January 1, 2021, the first day of the study (Table S7). This analysis was done to investigate whether the results could have been confounded by effect of prior infection.
2. Sensitivity analysis in which study inclusion and exclusion criteria were modified so as to include all PCR-positive and PCR-negative tests for each person, and regardless of the number of PCR-positive or PCR-negative tests each person had during the study (Table S8). This analysis was done to investigate how the results of the analyses could have been affected or biased by a broad study inclusion and exclusion criteria.
3. Sensitivity analysis in which study inclusion and exclusion criteria were modified so as to additionally include as controls persons who had a PCR-negative test during the study, in addition to the PCR-positive test during the study (Table S9). That is, persons with both PCR-positive and PCR-negative tests during the study were included both as cases and as controls, but at different time points. This analysis was done to investigate how the results of the analyses could have been affected or biased by this different study inclusion and exclusion criteria.
4. Sensitivity analysis in which study inclusion and exclusion criteria were modified so as to additionally include all PCR testing done for pre-travel or at port of entry purposes (Table

S10). This analysis was done to investigate how the results of the analyses could have been affected or biased by inclusion of this source of PCR testing in the study.

Additional sensitivity analyses were also conducted but not reported here for brevity. In these analyses we investigated the impact on the results of other different prescriptions for modifying the study inclusion and exclusion criteria, incorporating prior infection as a matching factor, a different categorization of the age variable, and interaction between age and vaccination. All analyses generated consistent results indicating the same pattern of declining effectiveness in the months following the second dose.

To provide further validation of study results, effectiveness was estimated using a multivariable logistic regression analysis of associations with a PCR-positive test, that is, by applying a different method from that of the main analysis of matched test-negative, case-control study design (Table S11). The derived adjusted odds ratios (AORs) were used to estimate vaccine effectiveness using the equation  $1 - \text{AOR}$ , that is assuming odds ratio approximates risk ratio for rare outcomes. The full unmatched sample of this study was used in this analysis, that is 142,300 individuals with a first PCR-positive test and 848,240 individuals with a first PCR-negative test. The multivariable logistic regression adjusted for sex (male, female), age (0-9, 10-19, 20-29, 30-39, 40-49, 50-59, 60-69, and 70+ years), nationality (Bangladeshis, Egyptians, Filipinos, Indians, Nepalese, Pakistani, Qataris, Sri Lankans, Sudanese, and other nationalities), reason for PCR testing (clinical suspicion, contact tracing, healthcare routine testing, survey, individual request, and other), and calendar week of PCR test starting from January 1, 2021.

**Table S1. STROBE checklist for case-control studies.**

|                           | Item No | Recommendation                                                                                                                                                                                                                                                                                                                                                                                                | Main text page                                                                                 |
|---------------------------|---------|---------------------------------------------------------------------------------------------------------------------------------------------------------------------------------------------------------------------------------------------------------------------------------------------------------------------------------------------------------------------------------------------------------------|------------------------------------------------------------------------------------------------|
| <b>Title and abstract</b> | 1       | (a) Indicate the study's design with a commonly used term in the title or the abstract<br>(b) Provide in the abstract an informative and balanced summary of what was done and what was found                                                                                                                                                                                                                 | 2<br>2                                                                                         |
| <b>Introduction</b>       |         |                                                                                                                                                                                                                                                                                                                                                                                                               |                                                                                                |
| Background/rationale      | 2       | Explain the scientific background and rationale for the investigation being reported                                                                                                                                                                                                                                                                                                                          | 3                                                                                              |
| Objectives                | 3       | State specific objectives, including any prespecified hypotheses                                                                                                                                                                                                                                                                                                                                              | 3                                                                                              |
| <b>Methods</b>            |         |                                                                                                                                                                                                                                                                                                                                                                                                               |                                                                                                |
| Study design              | 4       | Present key elements of study design                                                                                                                                                                                                                                                                                                                                                                          | 4-5 & Section 1                                                                                |
| Setting                   | 5       | Describe the setting, locations, and relevant dates, including periods of recruitment, exposure, follow-up, and data collection                                                                                                                                                                                                                                                                               | 4-5, Section 1, & Figure S2                                                                    |
| Participants              | 6       | (a) Give the eligibility criteria, and the sources and methods of case ascertainment and control selection. Give the rationale for the choice of cases and controls<br>(b) For matched studies, give matching criteria and the number of controls per case                                                                                                                                                    | 4-5, Sections 1-4, & Figure S2<br>4 & Section 1                                                |
| Variables                 | 7       | Clearly define all outcomes, exposures, predictors, potential confounders, and effect modifiers. Give diagnostic criteria, if applicable                                                                                                                                                                                                                                                                      | 4-6 & Sections 1-5                                                                             |
| Data sources/measurement  | 8       | For each variable of interest, give sources of data and details of methods of assessment (measurement). Describe comparability of assessment methods if there is more than one group                                                                                                                                                                                                                          | 4-6 & Section 1                                                                                |
| Bias                      | 9       | Describe any efforts to address potential sources of bias                                                                                                                                                                                                                                                                                                                                                     | 4-6 & Sections 1 & 5                                                                           |
| Study size                | 10      | Explain how the study size was arrived at                                                                                                                                                                                                                                                                                                                                                                     | 4-5, Section 1, & Figure S2                                                                    |
| Quantitative variables    | 11      | Explain how quantitative variables were handled in the analyses. If applicable, describe which groupings were chosen and why                                                                                                                                                                                                                                                                                  | 4-6, Table 1, Tables S2-S3, & Table S11                                                        |
| Statistical methods       | 12      | (a) Describe all statistical methods, including those used to control for confounding<br>(b) Describe any methods used to examine subgroups and interactions<br>(c) Explain how missing data were addressed<br>(d) If applicable, explain how matching of cases and controls was addressed<br>(e) Describe any sensitivity analyses                                                                           | 5-6 & Sections 1 & 5<br>5-6 & Sections 1 & 5<br>NA, see p. 4<br>5 & Section 1<br>6 & Section 5 |
| <b>Results</b>            |         |                                                                                                                                                                                                                                                                                                                                                                                                               |                                                                                                |
| Participants              | 13      | (a) Report numbers of individuals at each stage of study—eg numbers potentially eligible, examined for eligibility, confirmed eligible, included in the study, completing follow-up, and analysed<br>(b) Give reasons for non-participation at each stage<br>(c) Consider use of a flow diagram                                                                                                               | Figure S2, Table 1, Tables S2-S3, & Figure S1<br>4, Section 1, & Figure S2<br>Figure S2        |
| Descriptive data          | 14      | (a) Give characteristics of study participants (eg demographic, clinical, social) and information on exposures and potential confounders<br>(b) Indicate number of participants with missing data for each variable of interest                                                                                                                                                                               | 6-7, Table 1, & Tables S2-S3<br>NA, see p. 4                                                   |
| Outcome data              | 15      | Report numbers in each exposure category, or summary measures of exposure                                                                                                                                                                                                                                                                                                                                     | 8-10, Tables 2-4, & Tables S4-S6                                                               |
| Main results              | 16      | (a) Give unadjusted estimates and, if applicable, confounder-adjusted estimates and their precision (eg, 95% confidence interval). Make clear which confounders were adjusted for and why they were included<br>(b) Report category boundaries when continuous variables were categorized<br>(c) If relevant, consider translating estimates of relative risk into absolute risk for a meaningful time period | 8-10, Tables 2-4, Figure 2, & Tables S4-S6<br>Table 2-4 & Tables S4-S6<br>NA                   |
| Other analyses            | 17      | Report other analyses done—eg analyses of subgroups and interactions, and sensitivity analyses                                                                                                                                                                                                                                                                                                                | 10, Tables S4-S11                                                                              |
| <b>Discussion</b>         |         |                                                                                                                                                                                                                                                                                                                                                                                                               |                                                                                                |
| Key results               | 18      | Summarise key results with reference to study objectives                                                                                                                                                                                                                                                                                                                                                      | 10-12                                                                                          |
| Limitations               | 19      | Discuss limitations of the study, taking into account sources of potential bias or imprecision. Discuss both direction and magnitude of any potential bias                                                                                                                                                                                                                                                    | 13-14                                                                                          |
| Interpretation            | 20      | Give a cautious overall interpretation of results considering objectives, limitations, multiplicity of analyses, results from similar studies, and other relevant evidence                                                                                                                                                                                                                                    | 14                                                                                             |
| Generalisability          | 21      | Discuss the generalisability (external validity) of the study results                                                                                                                                                                                                                                                                                                                                         | 13                                                                                             |
| <b>Other information</b>  |         |                                                                                                                                                                                                                                                                                                                                                                                                               |                                                                                                |
| Funding                   | 22      | Give the source of funding and the role of the funders for the present study and, if applicable, for the original study on which the present article is based                                                                                                                                                                                                                                                 | 15                                                                                             |

Abbreviations: NA, not applicable.

Figure S1. A) Number of BNT162b2 vaccinations by calendar month. B) Number of PCR-positive cases by calendar month that were included in the analyses of this study.

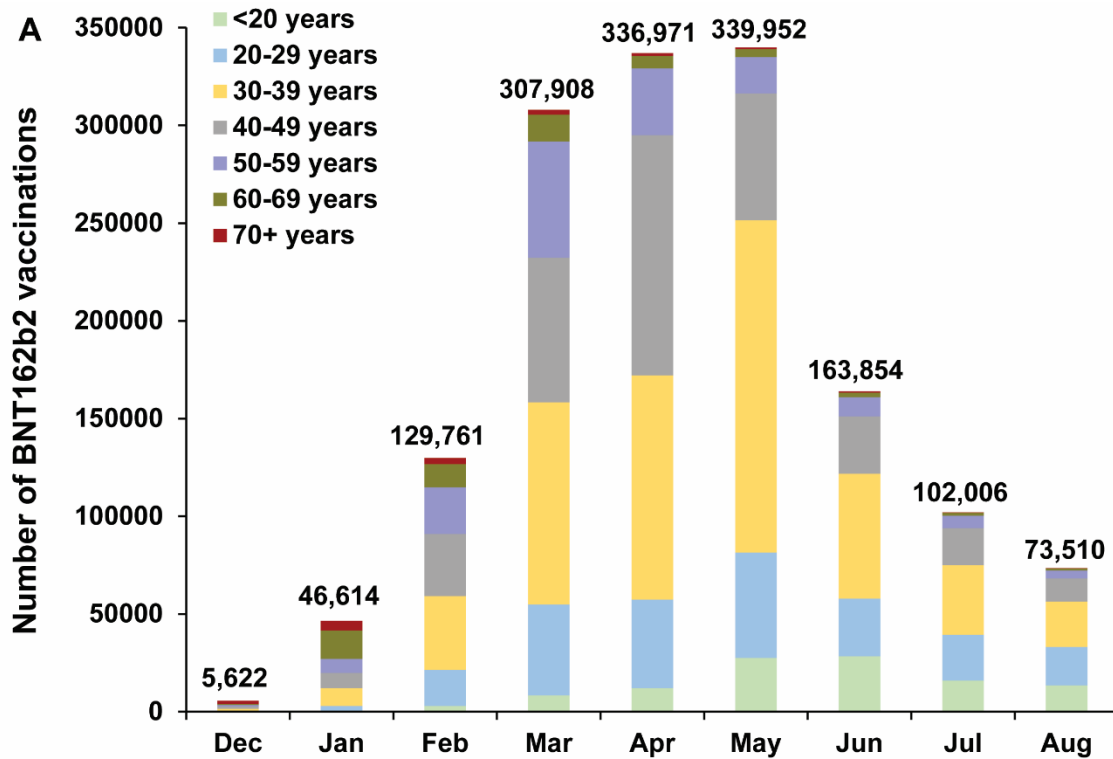

\*Partial monthly vaccination data from September were not included.

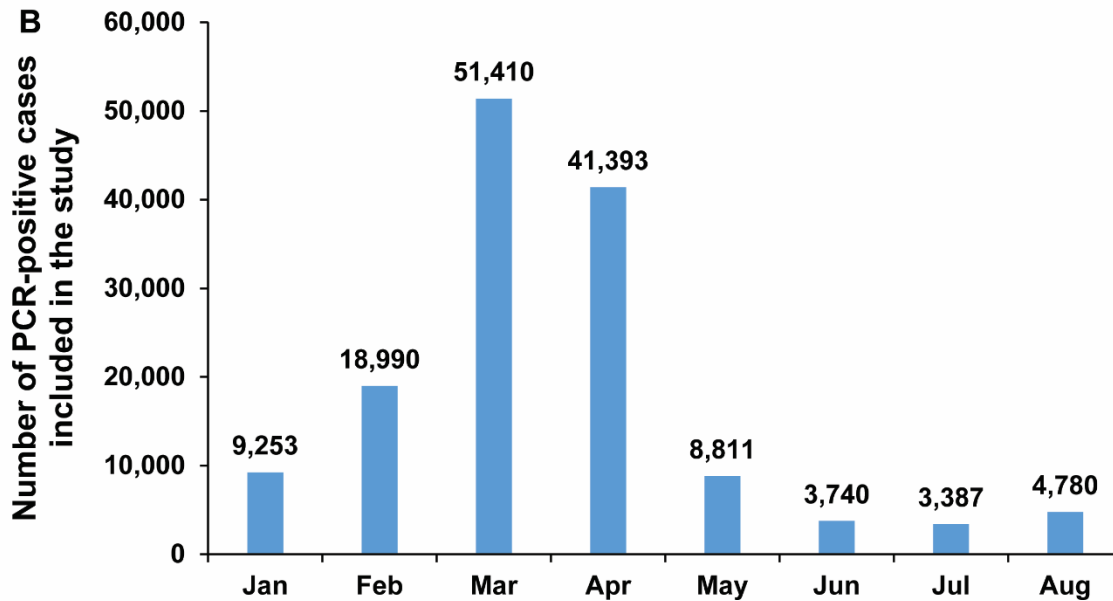

\*Partial monthly case data from September were not included.



**Figure S2. Flowchart describing the population selection process for investigating BNT162b2 vaccine effectiveness.**

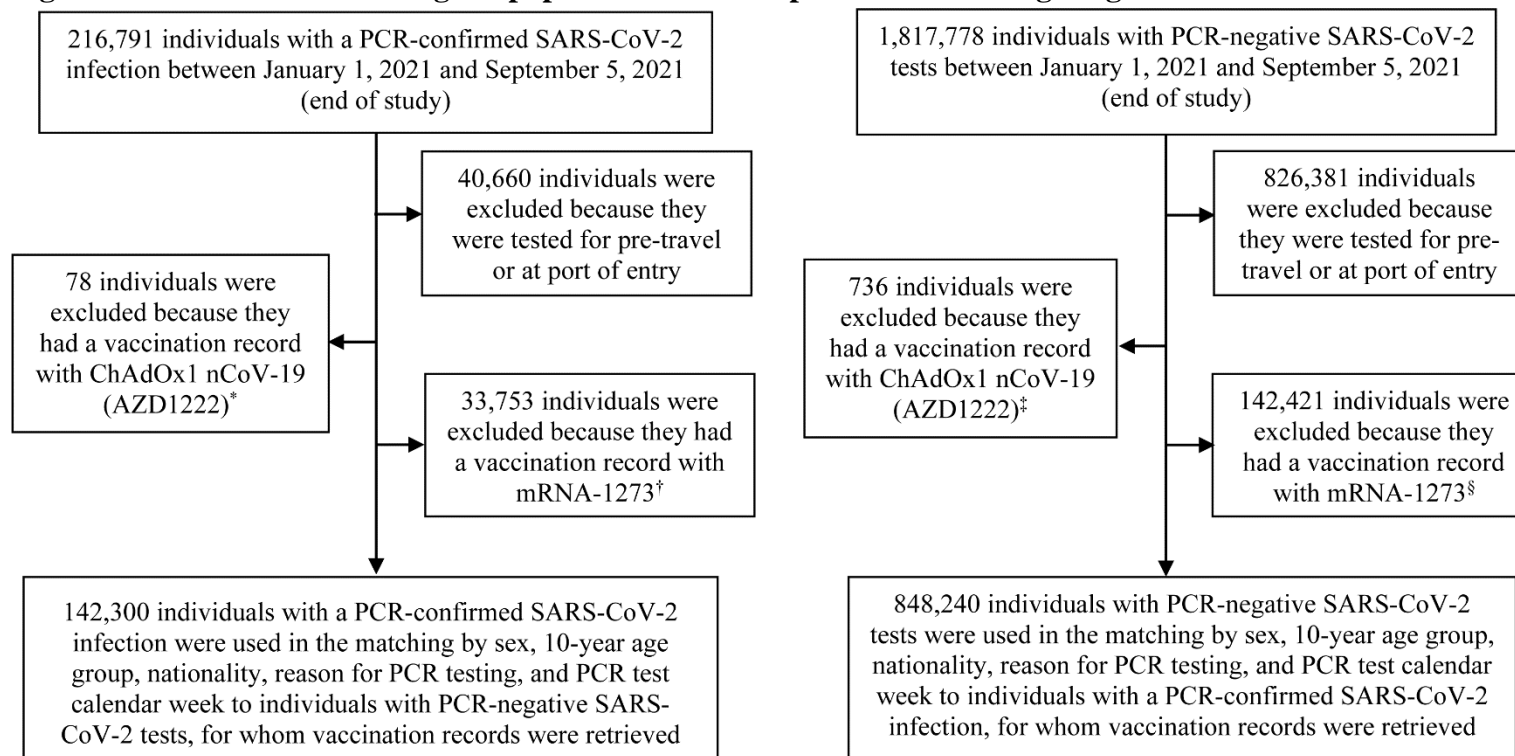

\*Sample includes 1 person who had another vaccination with mRNA-1273

†Sample includes 7 persons who had another vaccination with BNT162b2

‡Sample includes 1 person who had another vaccination with BNT162b2

§Sample includes 56 persons who had another vaccination with BNT162b2

**Note:** In each analysis for a specific time-since-vaccination stratum, we included only those vaccinated in this specific time-since-vaccination stratum and those unvaccinated (our reference group). Only matched pairs of PCR-positive and PCR-negative persons, in which both members of the pair were either unvaccinated or fell within each time-since-vaccination stratum have been included in the corresponding vaccine effectiveness estimate. Thus, the number of cases (and controls) varied across time-since-vaccination analyses.

**Table S2. Demographic characteristics of subjects and reasons for PCR testing among samples used to estimate BNT162b2 vaccine effectiveness. The table includes samples used in the 2<sup>nd</sup>-month-after-second-dose analysis, 3<sup>rd</sup>-month-after-second-dose analysis, and 4<sup>th</sup>-month-after-second-dose analysis.**

| Characteristics                  | 2 <sup>nd</sup> -month-after-second-dose |                  | 3 <sup>rd</sup> -month-after-second-dose |                  | 4 <sup>th</sup> -month-after-second-dose |                  |
|----------------------------------|------------------------------------------|------------------|------------------------------------------|------------------|------------------------------------------|------------------|
|                                  | Cases*                                   | Controls*        | Cases*                                   | Controls*        | Cases*                                   | Controls*        |
|                                  | (PCR-positive)                           | (PCR-negative)   | (PCR-positive)                           | (PCR-negative)   | (PCR-positive)                           | (PCR-negative)   |
|                                  | <b>N=113,324</b>                         | <b>N=113,324</b> | <b>N=112,188</b>                         | <b>N=112,188</b> | <b>N=111,562</b>                         | <b>N=111,562</b> |
| <b>Median age (IQR) — years</b>  | 31 (21-39)                               | 31 (21-39)       | 31 (21-39)                               | 31 (21-39)       | 31 (21-39)                               | 31 (21-39)       |
| <b>Age group — no. (%)</b>       |                                          |                  |                                          |                  |                                          |                  |
| <20 years                        | 26,794 (23.6)                            | 26,794 (23.6)    | 26,749 (23.8)                            | 26,749 (23.8)    | 26,727 (24.0)                            | 26,727 (24.0)    |
| 20-29 years                      | 24,477 (21.6)                            | 24,477 (21.6)    | 24,339 (21.7)                            | 24,339 (21.7)    | 24,355 (21.8)                            | 24,355 (21.8)    |
| 30-39 years                      | 35,887 (31.7)                            | 35,887 (31.7)    | 35,578 (31.7)                            | 35,578 (31.7)    | 35,373 (31.7)                            | 35,373 (31.7)    |
| 40-49 years                      | 18,638 (16.5)                            | 18,638 (16.5)    | 18,351 (16.4)                            | 18,351 (16.4)    | 18,196 (16.3)                            | 18,196 (16.3)    |
| 50-59 years                      | 5,800 (5.1)                              | 5,800 (5.1)      | 5,613 (5.0)                              | 5,613 (5.0)      | 5,516 (4.9)                              | 5,516 (4.9)      |
| 60-69 years                      | 1,347 (1.2)                              | 1,347 (1.2)      | 1,179 (1.1)                              | 1,179 (1.1)      | 1,077 (1.0)                              | 1,077 (1.0)      |
| 70+ years                        | 381 (0.3)                                | 381 (0.3)        | 379 (0.3)                                | 379 (0.3)        | 318 (0.3)                                | 318 (0.3)        |
| <b>Sex</b>                       |                                          |                  |                                          |                  |                                          |                  |
| Male                             | 77,860 (68.7)                            | 77,860 (68.7)    | 77,221 (68.8)                            | 77,221 (68.8)    | 76,884 (68.9)                            | 76,884 (68.9)    |
| Female                           | 35,464 (31.3)                            | 35,464 (31.3)    | 34,967 (31.2)                            | 34,967 (31.2)    | 34,678 (31.1)                            | 34,678 (31.1)    |
| <b>Nationality<sup>†</sup></b>   |                                          |                  |                                          |                  |                                          |                  |
| Bangladeshi                      | 8,207 (7.2)                              | 8,207 (7.2)      | 8,176 (7.3)                              | 8,176 (7.3)      | 8,158 (7.3)                              | 8,158 (7.3)      |
| Egyptian                         | 6,536 (5.8)                              | 6,536 (5.8)      | 6,447 (5.8)                              | 6,447 (5.8)      | 6,387 (5.7)                              | 6,387 (5.7)      |
| Filipino                         | 10,410 (9.2)                             | 10,410 (9.2)     | 10,337 (9.2)                             | 10,337 (9.2)     | 10,212 (9.2)                             | 10,212 (9.2)     |
| Indian                           | 29,338 (25.9)                            | 29,338 (25.9)    | 29,101 (25.9)                            | 29,101 (25.9)    | 28,965 (26.0)                            | 28,965 (26.0)    |
| Nepalese                         | 10,345 (9.1)                             | 10,345 (9.1)     | 10,320 (9.2)                             | 10,320 (9.2)     | 10,318 (9.3)                             | 10,318 (9.3)     |
| Pakistani                        | 5,722 (5.1)                              | 5,722 (5.1)      | 5,686 (5.1)                              | 5,686 (5.1)      | 5,672 (5.1)                              | 5,672 (5.1)      |
| Qatari                           | 17,226 (15.2)                            | 17,226 (15.2)    | 16,906 (15.1)                            | 16,906 (15.1)    | 16,777 (15.0)                            | 16,777 (15.0)    |
| Sri Lankan                       | 3,704 (3.3)                              | 3,704 (3.3)      | 3,687 (3.3)                              | 3,687 (3.3)      | 3,685 (3.3)                              | 3,685 (3.3)      |
| Sudanese                         | 3,223 (2.8)                              | 3,223 (2.8)      | 3,167 (2.8)                              | 3,167 (2.8)      | 3,142 (2.8)                              | 3,142 (2.8)      |
| Other nationalities <sup>‡</sup> | 18,613 (16.4)                            | 18,613 (16.4)    | 18,361 (16.4)                            | 18,361 (16.4)    | 18,246 (16.4)                            | 18,246 (16.4)    |
| <b>Reason for PCR testing</b>    |                                          |                  |                                          |                  |                                          |                  |
| Clinical suspicion               | 40,052 (35.3)                            | 40,052 (35.3)    | 39,402 (35.1)                            | 39,402 (35.1)    | 39,087 (35.0)                            | 39,087 (35.0)    |
| Contact tracing                  | 18,360 (16.2)                            | 18,360 (16.2)    | 18,242 (16.3)                            | 18,242 (16.3)    | 18,167 (16.3)                            | 18,167 (16.3)    |
| Healthcare routine testing       | 14,266 (12.6)                            | 14,266 (12.6)    | 14,244 (12.7)                            | 14,244 (12.7)    | 14,188 (12.7)                            | 14,188 (12.7)    |
| Survey                           | 27,419 (24.2)                            | 27,419 (24.2)    | 27,221 (24.3)                            | 27,221 (24.3)    | 27,076 (24.3)                            | 27,076 (24.3)    |
| Individual request               | 12,773 (11.3)                            | 12,773 (11.3)    | 12,653 (11.3)                            | 12,653 (11.3)    | 12,628 (11.3)                            | 12,628 (11.3)    |
| Other                            | 454 (0.4)                                | 454 (0.4)        | 426 (0.4)                                | 426 (0.4)        | 416 (0.4)                                | 416 (0.4)        |

Abbreviations: IQR, interquartile range; PCR, polymerase chain reaction.

\*Cases and controls were matched one-to-one by sex, 10-year age group, nationality, reason for PCR testing, and calendar week of PCR test.

<sup>†</sup>Nationalities were chosen to represent the most populous groups in Qatar.

<sup>‡</sup>These comprise 107 other nationalities in Qatar in the 2<sup>nd</sup>-month-after-second-dose analysis, 106 other nationalities in the 3<sup>rd</sup>-month-after-second-dose analysis, and 106 other nationalities in the 4<sup>th</sup>-month-after-second-dose analysis.

**Table S3. Demographic characteristics of subjects and reasons for PCR testing among samples used to estimate BNT162b2 vaccine effectiveness. The table includes samples used in the 5<sup>th</sup>-month-after-second-dose analysis, 6<sup>th</sup>-month-after-second-dose analysis, and 7<sup>th</sup>-month-after-second-dose analysis.**

| Characteristics                  | 5 <sup>th</sup> -month-after-second-dose |                  | 6 <sup>th</sup> -month-after-second-dose |                  | 7 <sup>th</sup> -month-after-second-dose |                  |
|----------------------------------|------------------------------------------|------------------|------------------------------------------|------------------|------------------------------------------|------------------|
|                                  | Cases*                                   | Controls*        | Cases*                                   | Controls*        | Cases*                                   | Controls*        |
|                                  | (PCR-positive)                           | (PCR-negative)   | (PCR-positive)                           | (PCR-negative)   | (PCR-positive)                           | (PCR-negative)   |
|                                  | <b>N=111,539</b>                         | <b>N=111,539</b> | <b>N=111,467</b>                         | <b>N=113,324</b> | <b>N=111,077</b>                         | <b>N=111,077</b> |
| <b>Median age (IQR) — years</b>  | 31 (21-39)                               | 31 (22-39)       | 31 (21-39)                               | 31 (22-39)       | 31 (21-39)                               | 31 (22-39)       |
| <b>Age group — no. (%)</b>       |                                          |                  |                                          |                  |                                          |                  |
| <20 years                        | 26,729 (24.0)                            | 26,729 (24.0)    | 26,710 (24.0)                            | 26,710 (24.0)    | 26,697 (24.0)                            | 26,697 (24.0)    |
| 20-29 years                      | 24,342 (21.8)                            | 24,342 (21.8)    | 24,303 (21.8)                            | 24,303 (21.8)    | 24,213 (21.8)                            | 24,213 (21.8)    |
| 30-39 years                      | 35,386 (31.7)                            | 35,386 (31.7)    | 35,368 (31.7)                            | 35,368 (31.7)    | 35,229 (31.7)                            | 35,229 (31.7)    |
| 40-49 years                      | 18,215 (16.3)                            | 18,215 (16.3)    | 18,223 (16.4)                            | 18,223 (16.4)    | 18,104 (16.3)                            | 18,104 (16.3)    |
| 50-59 years                      | 5,512 (4.9)                              | 5,512 (4.9)      | 5,512 (4.9)                              | 5,512 (4.9)      | 5,480 (4.9)                              | 5,480 (4.9)      |
| 60-69 years                      | 1,061 (1.0)                              | 1,061 (1.0)      | 1,057 (1.0)                              | 1,057 (1.0)      | 1,056 (1.0)                              | 1,056 (1.0)      |
| 70+ years                        | 294 (0.3)                                | 294 (0.3)        | 294 (0.3)                                | 294 (0.3)        | 298 (0.3)                                | 298 (0.3)        |
| <b>Sex</b>                       |                                          |                  |                                          |                  |                                          |                  |
| Male                             | 76,877 (68.9)                            | 76,877 (68.9)    | 76,843 (68.9)                            | 76,843 (68.9)    | 76,650 (69.0)                            | 76,650 (69.0)    |
| Female                           | 34,662 (31.1)                            | 34,662 (31.1)    | 34,624 (31.1)                            | 34,624 (31.1)    | 34,427 (31.0)                            | 34,427 (31.0)    |
| <b>Nationality<sup>†</sup></b>   |                                          |                  |                                          |                  |                                          |                  |
| Bangladeshi                      | 8,147 (7.3)                              | 8,147 (7.3)      | 8,144 (7.3)                              | 8,144 (7.3)      | 8,134 (7.3)                              | 8,134 (7.3)      |
| Egyptian                         | 6,400 (5.7)                              | 6,400 (5.7)      | 6,397 (5.7)                              | 6,397 (5.7)      | 6,380 (5.7)                              | 6,380 (5.7)      |
| Filipino                         | 10,177 (9.1)                             | 10,177 (9.1)     | 10,165 (9.1)                             | 10,165 (9.1)     | 10,145 (9.1)                             | 10,145 (9.1)     |
| Indian                           | 28,954 (26.0)                            | 28,954 (26.0)    | 28,938 (26.0)                            | 28,938 (26.0)    | 28,912 (26.0)                            | 28,912 (26.0)    |
| Nepalese                         | 10,315 (9.3)                             | 10,315 (9.3)     | 10,308 (9.3)                             | 10,308 (9.3)     | 10,307 (9.3)                             | 10,307 (9.3)     |
| Pakistani                        | 5,681 (5.1)                              | 5,681 (5.1)      | 5,671 (5.1)                              | 5,671 (5.1)      | 5,664 (5.1)                              | 5,664 (5.1)      |
| Qatari                           | 16,793 (15.1)                            | 16,793 (15.1)    | 16,763 (15.0)                            | 16,763 (15.0)    | 16,558 (14.9)                            | 16,558 (14.9)    |
| Sri Lankan                       | 3,684 (3.3)                              | 3,684 (3.3)      | 3,682 (3.3)                              | 3,682 (3.3)      | 3,677 (3.3)                              | 3,677 (3.3)      |
| Sudanese                         | 3,142 (2.8)                              | 3,142 (2.8)      | 3,142 (2.8)                              | 3,142 (2.8)      | 3,136 (2.8)                              | 3,136 (2.8)      |
| Other nationalities <sup>‡</sup> | 18,246 (16.4)                            | 18,246 (16.4)    | 18,257 (16.4)                            | 18,257 (16.4)    | 18,164 (16.4)                            | 18,164 (16.4)    |
| <b>Reason for PCR testing</b>    |                                          |                  |                                          |                  |                                          |                  |
| Clinical suspicion               | 39,092 (35.1)                            | 39,092 (35.1)    | 39,030 (35.0)                            | 39,030 (35.0)    | 38,836 (35.0)                            | 38,836 (35.0)    |
| Contact tracing                  | 18,143 (16.3)                            | 18,143 (16.3)    | 18,136 (16.3)                            | 18,136 (16.3)    | 18,115 (16.3)                            | 18,115 (16.3)    |
| Healthcare routine testing       | 14,194 (12.7)                            | 14,194 (12.7)    | 14,179 (12.7)                            | 14,179 (12.7)    | 14,164 (12.8)                            | 14,164 (12.8)    |
| Survey                           | 27,055 (24.3)                            | 27,055 (24.3)    | 27,083 (24.3)                            | 27,083 (24.3)    | 26,977 (24.3)                            | 26,977 (24.3)    |
| Individual request               | 12,646 (11.3)                            | 12,646 (11.3)    | 12,628 (11.3)                            | 12,628 (11.3)    | 12,578 (11.3)                            | 12,578 (11.3)    |
| Other                            | 409 (0.4)                                | 409 (0.4)        | 411 (0.4)                                | 411 (0.4)        | 407 (0.4)                                | 407 (0.4)        |

Abbreviations: IQR, interquartile range; PCR, polymerase chain reaction.

\*Cases and controls were matched one-to-one by sex, 10-year age group, nationality, reason for PCR testing, and calendar week of PCR test.

<sup>†</sup>Nationalities were chosen to represent the most populous groups in Qatar.

<sup>‡</sup>These comprise 106 other nationalities in Qatar in the 5<sup>th</sup>-month-after-second-dose analysis, 106 other nationalities in the 6<sup>th</sup>-month-after-second-dose analysis, and 106 other nationalities in the 7<sup>th</sup>-month-after-second-dose analysis.

**Table S4. Effectiveness of the BNT162b2 vaccine against any SARS-CoV-2 infection and against any severe, critical, or fatal COVID-19 disease, stratified by age (<60 years or ≥60 years).**

| Sub-studies*                                           | Effectiveness against infection      |              |                                         |              |                                                | Effectiveness against hospitalization and death                         |              |                                         |              |                                                |
|--------------------------------------------------------|--------------------------------------|--------------|-----------------------------------------|--------------|------------------------------------------------|-------------------------------------------------------------------------|--------------|-----------------------------------------|--------------|------------------------------------------------|
|                                                        | Cases <sup>†</sup><br>(PCR-positive) |              | Controls <sup>†</sup><br>(PCR-negative) |              | Effectiveness<br>in %<br>(95% CI) <sup>‡</sup> | Cases <sup>†</sup><br>(Severe, critical, or fatal disease) <sup>§</sup> |              | Controls <sup>†</sup><br>(PCR-negative) |              | Effectiveness<br>in %<br>(95% CI) <sup>‡</sup> |
|                                                        | Vaccinated                           | Unvaccinated | Vaccinated                              | Unvaccinated |                                                | Vaccinated                                                              | Unvaccinated | Vaccinated                              | Unvaccinated |                                                |
| <b>Age &lt;60 years</b>                                |                                      |              |                                         |              |                                                |                                                                         |              |                                         |              |                                                |
| 0-13 days after first dose                             | 4,031                                | 109,749      | 3,883                                   | 109,897      | -4.3<br>(-9.3 ; 0.5)                           | 196                                                                     | 3,637        | 236                                     | 3,597        | 18.6<br>(0.6 ; 33.3)                           |
| ≥14 days after first dose and no second dose           | 2,172                                | 110,137      | 3,386                                   | 108,923      | 38.7<br>(35.1 ; 42.1)                          | 67                                                                      | 3,655        | 213                                     | 3,509        | 71.9<br>(62.3 ; 79.1)                          |
| 1 <sup>st</sup> month after the second dose            | 2,693                                | 111,527      | 9,449                                   | 104,771      | 77.8<br>(76.7 ; 78.9)                          | 19                                                                      | 3,676        | 459                                     | 3,236        | 96.9<br>(94.8 ; 98.2)                          |
| 2 <sup>nd</sup> month after the second dose            | 1,218                                | 110,378      | 3,785                                   | 107,811      | 73.4<br>(71.4 ; 75.2)                          | 9                                                                       | 3,652        | 200                                     | 3,461        | 97.0<br>(93.1 ; 98.6)                          |
| 3 <sup>rd</sup> month after the second dose            | 659                                  | 109,971      | 1,840                                   | 108,790      | 69.9<br>(66.8 ; 72.8)                          | 4                                                                       | 3,639        | 102                                     | 3,541        | 97.0<br>(90.6 ; 99.1)                          |
| 4 <sup>th</sup> month after the second dose            | 445                                  | 109,722      | 777                                     | 109,390      | 51.6<br>(44.5 ; 57.7)                          | 3                                                                       | 3,627        | 26                                      | 3,604        | 88.5<br>(61.9 ; 96.5)                          |
| 5 <sup>th</sup> month after the second dose            | 527                                  | 109,657      | 602                                     | 109,582      | 18.4<br>(5.7 ; 29.4)                           | 0                                                                       | 3,629        | 21                                      | 3,608        | 100.0<br>(Omitted) <sup>¶</sup>                |
| 6 <sup>th</sup> month after the second dose            | 424                                  | 109,692      | 474                                     | 109,642      | 17.4<br>(1.9 ; 30.5)                           | 5                                                                       | 3,627        | 19                                      | 3,613        | 93.3<br>(49.5 ; 99.1)                          |
| 7 <sup>th</sup> month or greater after the second dose | 101                                  | 109,622      | 127                                     | 109,596      | 24.5<br>(-0.9 ; 43.5)                          | 3                                                                       | 3,623        | 7                                       | 3,619        | 57.1<br>(-65.7 ; 88.9)                         |
| <b>Age ≥60 years</b>                                   |                                      |              |                                         |              |                                                |                                                                         |              |                                         |              |                                                |
| 0-13 days after first dose                             | 197                                  | 1,349        | 170                                     | 1,376        | -19.0<br>(-48.8 ; 4.8)                         | 49                                                                      | 364          | 50                                      | 363          | 2.5<br>(-51.5 ; 37.3)                          |
| ≥14 days after first dose and no second dose           | 186                                  | 1,335        | 181                                     | 1,340        | -3.4<br>(-29.7 ; 17.6)                         | 35                                                                      | 377          | 59                                      | 353          | 44.4<br>(13.2 ; 64.4)                          |
| 1 <sup>st</sup> month after the second dose            | 222                                  | 1,471        | 537                                     | 1,156        | 71.1<br>(64.8 ; 76.3)                          | 13                                                                      | 406          | 126                                     | 293          | 92.6<br>(85.5 ; 96.3)                          |
| 2 <sup>nd</sup> month after the second dose            | 232                                  | 1,496        | 519                                     | 1,209        | 71.9<br>(65.4 ; 77.2)                          | 14                                                                      | 410          | 123                                     | 301          | 96.5<br>(90.4 ; 98.7)                          |
| 3 <sup>rd</sup> month after the second dose            | 141                                  | 1,417        | 288                                     | 1,270        | 67.4<br>(57.4 ; 75.1)                          | 13                                                                      | 387          | 79                                      | 321          | 90.4<br>(79.2 ; 95.6)                          |
| 4 <sup>th</sup> month after the second dose            | 47                                   | 1,348        | 79                                      | 1,316        | 53.3<br>(26.9 ; 70.2)                          | 7                                                                       | 369          | 25                                      | 351          | 78.3<br>(42.8 ; 91.7)                          |
| 5 <sup>th</sup> month after the second dose            | 21                                   | 1,334        | 44                                      | 1,311        | 79.3<br>(50.2 ; 91.4)                          | 0                                                                       | 361          | 12                                      | 349          | 100.0<br>(Omitted) <sup>¶</sup>                |
| 6 <sup>th</sup> month after the second dose            | 36                                   | 1,315        | 38                                      | 1,313        | 15.4<br>(-88.8 ; 62.1)                         | 3                                                                       | 361          | 5                                       | 359          | 66.7<br>(-220.5 ; 96.5)                        |
| 7 <sup>th</sup> month or greater after the second dose | 34                                   | 1,320        | 35                                      | 1,319        | 6.6<br>(-93.4 ; 54.9)                          | 3                                                                       | 360          | 4                                       | 359          | 50.0<br>(-451.4 ; 95.5)                        |

Abbreviations: CI, confidence interval; PCR, polymerase chain reaction.

<sup>8</sup>In each analysis for a specific time-since-vaccination stratum, we included only those vaccinated in this specific time-since-vaccination stratum and those unvaccinated. Only matched pairs of PCR-positive and PCR-negative persons, in which both members of the pair were either unvaccinated or fell within each time-since-vaccination stratum have been included in the corresponding vaccine effectiveness estimate. Thus, the number of cases (and controls) varied across time-since-vaccination analyses.

<sup>†</sup>Cases and controls were matched one-to-one by sex, 10-year age group, nationality, reason for PCR testing, and calendar week of PCR test.

<sup>‡</sup>Vaccine effectiveness was estimated using the test-negative, case-control study design.<sup>13,14</sup>

<sup>§</sup>Severity,<sup>5</sup> criticality,<sup>5</sup> and fatality<sup>4</sup> were defined as per World Health Organization guidelines.

<sup>\*</sup>Confidence interval could not be estimated because of zero events among vaccinated.

**Table S5. Effectiveness of the BNT162b2 vaccine against each of SARS-CoV-2 Alpha<sup>12</sup> (B.1.1.7), Beta<sup>12</sup> (B.1.351), and Delta<sup>12</sup> (B.1.617.2) variant infections.**

| Sub-studies*                                           | Effectiveness against infection      |              |                                         |              |                                                |
|--------------------------------------------------------|--------------------------------------|--------------|-----------------------------------------|--------------|------------------------------------------------|
|                                                        | Cases <sup>†</sup><br>(PCR-positive) |              | Controls <sup>†</sup><br>(PCR-negative) |              | Effectiveness<br>in %<br>(95% CI) <sup>‡</sup> |
|                                                        | Vaccinated                           | Unvaccinated | Vaccinated                              | Unvaccinated |                                                |
| <b>Infection with the Alpha variant<sup>§</sup></b>    |                                      |              |                                         |              |                                                |
| 0-13 days after first dose                             | 36                                   | 1,584        | 41                                      | 1,579        | 12.8<br>(-38.1 ; 45.0)                         |
| ≥14 days after first dose and no second dose           | 27                                   | 1,581        | 50                                      | 1,558        | 47.9<br>(15.5 ; 67.9)                          |
| 1 <sup>st</sup> month after the second dose            | 53                                   | 1,587        | 184                                     | 1,456        | 77.1<br>(67.5 ; 83.8)                          |
| 2 <sup>nd</sup> month after the second dose            | 18                                   | 1,587        | 111                                     | 1,494        | 88.6<br>(79.2-93.7)                            |
| 3 <sup>rd</sup> month after the second dose            | 18                                   | 1,580        | 64                                      | 1,534        | 80.7<br>(63.2 ; 89.9)                          |
| 4 <sup>th</sup> month after the second dose            | 12                                   | 1,588        | 29                                      | 1,571        | 60.7<br>(21.1 ; 80.4)                          |
| 5 <sup>th</sup> month after the second dose            | 15                                   | 1,583        | 20                                      | 1,578        | 33.3<br>(-48.3 ; 70.0)                         |
| 6 <sup>th</sup> or greater month after the second dose | 2                                    | 1,587        | 6                                       | 1,583        | 80.0<br>(-71.2 ; 97.7)                         |
| <b>Infection with the Beta variant<sup>§</sup></b>     |                                      |              |                                         |              |                                                |
| 0-13 days after first dose                             | 118                                  | 2,984        | 99                                      | 3,003        | -21.1<br>(-60.1 ; 8.4)                         |
| ≥14 days after first dose and no second dose           | 72                                   | 3,000        | 95                                      | 2,977        | 25.8<br>(-2.0 ; 46.1)                          |
| 1 <sup>st</sup> month after the second dose            | 124                                  | 3,013        | 402                                     | 2,735        | 74.3<br>(67.9 ; 79.5)                          |
| 2 <sup>nd</sup> month after the second dose            | 106                                  | 3,015        | 230                                     | 2,891        | 63.9<br>(52.6 ; 72.5)                          |
| 3 <sup>rd</sup> month after the second dose            | 55                                   | 2,996        | 111                                     | 2,940        | 56.0<br>(37.3 ; 69.1)                          |
| 4 <sup>th</sup> month after the second dose            | 14                                   | 2,990        | 20                                      | 2,984        | 37.5<br>(-37.7 ; 71.6)                         |
| 5 <sup>th</sup> month after the second dose            | 8                                    | 2,997        | 14                                      | 2,991        | 54.5<br>(-30.8 ; 84.2)                         |
| 6 <sup>th</sup> month after the second dose            | 5                                    | 2,986        | 7                                       | 2,984        | 40.0<br>(-151.1 ; 85.7)                        |
| <b>Infection with the Delta variant<sup>§</sup></b>    |                                      |              |                                         |              |                                                |
| 0-13 days after first dose                             | 27                                   | 2,132        | 41                                      | 2,118        | 37.8<br>(-4.6 ; 63.1)                          |
| ≥14 days after first dose and no second dose           | 27                                   | 2,134        | 72                                      | 2,089        | 63.4<br>(42.6 ; 76.6)                          |
| 1 <sup>st</sup> month after the second dose            | 24                                   | 2,139        | 151                                     | 2,012        | 87.6<br>(79.7 ; 92.3)                          |
| 2 <sup>nd</sup> month after the second dose            | 60                                   | 2,153        | 200                                     | 2,013        | 73.3<br>(63.6 ; 80.4)                          |
| 3 <sup>rd</sup> month after the second dose            | 98                                   | 2,146        | 209                                     | 2,035        | 62.4<br>(50.2 ; 71.6)                          |
| 4 <sup>th</sup> month after the second dose            | 132                                  | 2,153        | 178                                     | 2,107        | 35.1<br>(14.7 ; 50.6)                          |
| 5 <sup>th</sup> month after the second dose            | 191                                  | 2,141        | 220                                     | 2,112        | 20.4<br>(-1.9 ; 37.8)                          |
| 6 <sup>th</sup> month after the second dose            | 145                                  | 2,144        | 160                                     | 2,129        | 17.9<br>(-12.9 ; 40.3)                         |

Abbreviations: CI, confidence interval; PCR, polymerase chain reaction.

<sup>†</sup>In each analysis for a specific time-since-vaccination stratum, we included only those vaccinated in this specific time-since-vaccination stratum and those unvaccinated. Only matched pairs of PCR-positive and PCR-negative persons, in which both members of the pair were either unvaccinated or fell within each time-since-vaccination stratum have been included in the corresponding vaccine effectiveness estimate. Thus, the number of cases (and controls) varied across time-since-vaccination analyses.

<sup>‡</sup>Cases and controls were matched one-to-one by sex, 10-year age group, nationality, reason for PCR testing, and calendar week of PCR test.

<sup>§</sup>Vaccine effectiveness was estimated using the test-negative, case-control study design.<sup>13,14</sup>

<sup>§</sup>Ascertainment of Alpha<sup>12</sup> (B.1.1.7), Beta<sup>12</sup> (B.1.351) and Delta<sup>12</sup> (B.1.617.2) cases was based on RT-qPCR genotyping of positive clinical samples (Supplementary Section 3).<sup>6,8,11</sup>

**Table S6. Effectiveness of the BNT162b2 vaccine against each of severe COVID-19 disease, critical COVID-19 disease, and fatal COVID-19 disease.**

| Sub-studies*                                           | Cases <sup>†</sup><br>(COVID-19 disease) |              | Controls <sup>†</sup><br>(PCR-negative) |              | Effectiveness in<br>%<br>(95% CI) <sup>‡</sup> |
|--------------------------------------------------------|------------------------------------------|--------------|-----------------------------------------|--------------|------------------------------------------------|
|                                                        | Vaccinated                               | Unvaccinated | Vaccinated                              | Unvaccinated |                                                |
| <b>Severe disease<sup>§</sup></b>                      |                                          |              |                                         |              |                                                |
| 0-13 days after first dose                             | 216                                      | 3,386        | 230                                     | 3,372        | 6.8<br>(-13.4 ; 23.4)                          |
| ≥14 days after first dose and no second dose           | 85                                       | 3,411        | 210                                     | 3,286        | 63.1<br>(51.8 ; 71.8)                          |
| 1 <sup>st</sup> month after the second dose            | 30                                       | 3,450        | 468                                     | 3,012        | 95.2<br>(92.7 ; 96.9)                          |
| 2 <sup>nd</sup> month after the second dose            | 16                                       | 3,441        | 252                                     | 3,205        | 97.1<br>(93.9 ; 98.6)                          |
| 3 <sup>rd</sup> month after the second dose            | 12                                       | 3,418        | 141                                     | 3,289        | 94.9<br>(89.0 ; 97.6)                          |
| 4 <sup>th</sup> month after the second dose            | 9                                        | 3,387        | 41                                      | 3,355        | 82.1<br>(59.9 ; 92.0)                          |
| 5 <sup>th</sup> month after the second dose            | 0                                        | 3,383        | 30                                      | 3,353        | 100.0<br>(Omitted) <sup>¶</sup>                |
| 6 <sup>th</sup> month or greater after the second dose | 13                                       | 3,385        | 31                                      | 3,367        | 81.8<br>(47.2 ; 93.7)                          |
| <b>Critical disease<sup>§</sup></b>                    |                                          |              |                                         |              |                                                |
| 0-13 days after first dose                             | 28                                       | 606          | 56                                      | 578          | 58.3<br>(29.8 ; 75.3)                          |
| ≥14 days after first dose and no second dose           | 16                                       | 612          | 62                                      | 566          | 78.0<br>(59.8 ; 87.9)                          |
| 1 <sup>st</sup> month after the second dose            | 2                                        | 622          | 116                                     | 508          | 99.1<br>(93.8 ; 99.9)                          |
| 2 <sup>nd</sup> month after the second dose            | 6                                        | 611          | 69                                      | 548          | 95.5<br>(85.5 ; 98.6)                          |
| 3 <sup>rd</sup> month after the second dose            | 5                                        | 599          | 40                                      | 564          | 92.1<br>(74.4 ; 97.6)                          |
| 4 <sup>th</sup> month after the second dose            | 1                                        | 600          | 10                                      | 591          | 90.0<br>(21.9 ; 98.7)                          |
| 5 <sup>th</sup> month after the second dose            | 0                                        | 598          | 3                                       | 595          | 100.0<br>(Omitted) <sup>¶</sup>                |
| 6 <sup>th</sup> month or greater after the second dose | 1                                        | 596          | 6                                       | 591          | 83.3<br>(-38.4 ; 98.0)                         |
| <b>Fatal disease<sup>§</sup></b>                       |                                          |              |                                         |              |                                                |
| 0-13 days after first dose                             | 13                                       | 220          | 22                                      | 211          | 47.4<br>(-13.2 ; 75.5)                         |
| ≥14 days after first dose and no second dose           | 11                                       | 229          | 28                                      | 212          | 63.0<br>(23.5 ; 82.1)                          |
| 1 <sup>st</sup> month after the second dose            | 5                                        | 236          | 67                                      | 174          | 95.4<br>(85.3 ; 98.5)                          |
| 2 <sup>nd</sup> month after the second dose            | 6                                        | 233          | 46                                      | 193          | 95.2<br>(80.3 ; 98.8)                          |
| 3 <sup>rd</sup> month after the second dose            | 1                                        | 228          | 23                                      | 206          | 95.7<br>(67.8 ; 99.4)                          |
| 4 <sup>th</sup> month after the second dose            | 2                                        | 219          | 2                                       | 219          | 0.0<br>(-609.9 ; 85.9)                         |
| 5 <sup>th</sup> month after the second dose            | 0                                        | 221          | 1                                       | 220          | 100.0<br>(Omitted) <sup>¶</sup>                |
| 6 <sup>th</sup> month or greater after the second dose | 0                                        | 215          | 0                                       | 215          | Omitted <sup>**</sup>                          |

Abbreviations: CI, confidence interval; PCR, polymerase chain reaction.

<sup>†</sup>In each analysis for a specific time-since-vaccination stratum, we included only those vaccinated in this specific time-since-vaccination stratum and those unvaccinated. Only matched pairs of PCR-positive and PCR-negative persons, in which both members of the pair were either unvaccinated or fell within each time-since-vaccination stratum have been included in the corresponding vaccine effectiveness estimate. Thus, the number of cases (and controls) varied across time-since-vaccination analyses.

<sup>‡</sup>Cases and controls were matched one-to-one by sex, 10-year age group, nationality, reason for PCR testing, and calendar week of PCR test.

<sup>§</sup>Vaccine effectiveness was estimated using the test-negative, case-control study design.<sup>13,14</sup>

<sup>¶</sup>Severity,<sup>5</sup> criticality,<sup>5</sup> and fatality<sup>4</sup> were defined as per World Health Organization guidelines.

<sup>\*\*</sup>Confidence interval could not be estimated because of zero events among vaccinated.

<sup>\*\*\*</sup>There were no vaccinated persons among cases and controls; thus effectiveness could not be estimated.

**Table S7. Sensitivity analysis in which study inclusion and exclusion criteria were modified so as to additionally exclude any case or control with a prior infection, that is any person with a PCR-positive test prior to January 1, 2021, the first day of the study. Effectiveness of the BNT162b2 vaccine against any SARS-CoV-2 infection and against any severe, critical, or fatal COVID-19 disease.**

| Sub-studies*                                           | Effectiveness against infection      |              |                                         |              |                                                | Effectiveness against hospitalization and death                         |              |                                         |              |                                                |
|--------------------------------------------------------|--------------------------------------|--------------|-----------------------------------------|--------------|------------------------------------------------|-------------------------------------------------------------------------|--------------|-----------------------------------------|--------------|------------------------------------------------|
|                                                        | Cases <sup>†</sup><br>(PCR-positive) |              | Controls <sup>†</sup><br>(PCR-negative) |              | Effectiveness<br>in %<br>(95% CI) <sup>‡</sup> | Cases <sup>†</sup><br>(Severe, critical, or fatal disease) <sup>§</sup> |              | Controls <sup>†</sup><br>(PCR-negative) |              | Effectiveness<br>in %<br>(95% CI) <sup>‡</sup> |
|                                                        | Vaccinated                           | Unvaccinated | Vaccinated                              | Unvaccinated |                                                | Vaccinated                                                              | Unvaccinated | Vaccinated                              | Unvaccinated |                                                |
| 0-13 days after first dose                             | 4,050                                | 108,783      | 3,848                                   | 108,985      | -5.8<br>(-10.9 ; -1.0)                         | 247                                                                     | 3,960        | 272                                     | 3,935        | 10.3<br>(-7.7 ; 25.3)                          |
| ≥14 days after first dose and no second dose           | 2,292                                | 109,091      | 3,492                                   | 107,891      | 37.0<br>(33.4 ; 40.3)                          | 102                                                                     | 3,996        | 307                                     | 3,791        | 70.7<br>(62.7 ; 77.0)                          |
| 1 <sup>st</sup> month after the second dose            | 2,829                                | 110,641      | 9,618                                   | 103,852      | 77.0<br>(75.9 ; 78.1)                          | 30                                                                      | 4,040        | 628                                     | 3,442        | 96.1<br>(94.2 ; 97.4)                          |
| 2 <sup>nd</sup> month after the second dose            | 1,420                                | 109,449      | 4,240                                   | 106,629      | 73.9<br>(72.1 ; 75.7)                          | 22                                                                      | 4,022        | 335                                     | 3,709        | 95.7<br>(92.7 ; 97.5)                          |
| 3 <sup>rd</sup> month after the second dose            | 793                                  | 109,041      | 1,988                                   | 107,846      | 67.5<br>(64.3 ; 70.4)                          | 17                                                                      | 3,985        | 183                                     | 3,819        | 94.9<br>(90.0 ; 97.4)                          |
| 4 <sup>th</sup> month after the second dose            | 479                                  | 108,690      | 791                                     | 108,378      | 47.6<br>(40.3 ; 54.0)                          | 11                                                                      | 3,951        | 57                                      | 3,905        | 86.8<br>(71.0 ; 94.0)                          |
| 5 <sup>th</sup> month after the second dose            | 533                                  | 108,627      | 665                                     | 108,495      | 28.3<br>(17.5 ; 37.7)                          | 0                                                                       | 3,955        | 28                                      | 3,927        | 100.0<br>(Omitted) <sup>¶</sup>                |
| 6 <sup>th</sup> month after the second dose            | 449                                  | 108,622      | 500                                     | 108,571      | 17.2<br>(2.0 ; 30.1)                           | 8                                                                       | 3,949        | 26                                      | 3,931        | 94.7<br>(60.7 ; 99.3)                          |
| 7 <sup>th</sup> month or greater after the second dose | 131                                  | 108,561      | 149                                     | 108,543      | 18.2<br>(-9.7 ; 39.0)                          | 6                                                                       | 3,952        | 12                                      | 3,946        | 60.0<br>(-27.5 ; 87.5)                         |

Abbreviations: CI, confidence interval; PCR, polymerase chain reaction.

<sup>†</sup>In each analysis for a specific time-since-vaccination stratum, we included only those vaccinated in this specific time-since-vaccination stratum and those unvaccinated. Only matched pairs of PCR-positive and PCR-negative persons, in which both members of the pair were either unvaccinated or fell within each time-since-vaccination stratum have been included in the corresponding vaccine effectiveness estimate. Thus, the number of cases (and controls) varied across time-since-vaccination analyses.

<sup>‡</sup>Cases and controls were matched one-to-one by sex, 10-year age group, nationality, reason for PCR testing, and calendar week of PCR test.

<sup>§</sup>Vaccine effectiveness was estimated using the test-negative, case-control study design.<sup>13,14</sup>

<sup>§</sup>Severity,<sup>5</sup> criticality,<sup>5</sup> and fatality<sup>4</sup> were defined as per World Health Organization guidelines.

<sup>¶</sup>Confidence interval could not be estimated because of zero events among vaccinated.



**Table S8. Sensitivity analysis in which study inclusion and exclusion criteria were modified so as to include all PCR-positive and PCR-negative tests for each person, and regardless of the number of PCR-positive or PCR-negative tests each person had during the study, January 1, 2021 to September 5, 2021. Effectiveness of the BNT162b2 vaccine against any SARS-CoV-2 infection and against any severe, critical, or fatal COVID-19 disease. This analysis appears to have been affected by a positive bias due to perhaps inclusion of repeat testing, such as more “repeat testers” among controls, that is persons with a higher level of health care-seeking behavior and presumably lower risk of infection. This can be seen in the results for vaccine effectiveness at 0-13 days after the first dose. Based on evidence from the clinical trials and biological plausibility, it is not expected to observe a positive effectiveness against specifically *infection* in the first two weeks after the first dose, but the analysis indicated a small statistically significant positive effectiveness.**

| Sub-studies*                                           | Effectiveness against infection   |              |                                      |              | Effectiveness in % (95% CI) <sup>‡</sup> | Effectiveness against hospitalization and death                      |              |                                      |              | Effectiveness in % (95% CI) <sup>‡</sup> |
|--------------------------------------------------------|-----------------------------------|--------------|--------------------------------------|--------------|------------------------------------------|----------------------------------------------------------------------|--------------|--------------------------------------|--------------|------------------------------------------|
|                                                        | Cases <sup>†</sup> (PCR-positive) |              | Controls <sup>†</sup> (PCR-negative) |              |                                          | Cases <sup>†</sup> (Severe, critical, or fatal disease) <sup>§</sup> |              | Controls <sup>†</sup> (PCR-negative) |              |                                          |
|                                                        | Vaccinated                        | Unvaccinated | Vaccinated                           | Unvaccinated |                                          | Vaccinated                                                           | Unvaccinated | Vaccinated                           | Unvaccinated |                                          |
| 0-13 days after first dose                             | 4,842                             | 138,197      | 5,428                                | 137,611      | 11.9<br>(8.2 ; 15.4)                     | 290                                                                  | 5,082        | 323                                  | 5,049        | 11.4<br>(-4.8 ; 25.1)                    |
| ≥14 days after first dose and no second dose           | 3,877                             | 138,574      | 5,682                                | 136,769      | 34.8<br>(31.9 ; 37.6)                    | 183                                                                  | 5,082        | 412                                  | 4,853        | 60.7<br>(52.5 ; 67.5)                    |
| 1 <sup>st</sup> month after the second dose            | 3,558                             | 139,618      | 13,205                               | 129,971      | 79.0<br>(78.1 ; 79.9)                    | 41                                                                   | 5,133        | 760                                  | 4,414        | 96.1<br>(94.4 ; 97.3)                    |
| 2 <sup>nd</sup> month after the second dose            | 1,864                             | 138,751      | 6,613                                | 134,002      | 77.8<br>(76.5 ; 79.1)                    | 32                                                                   | 5,124        | 447                                  | 4,709        | 95.6<br>(93.1 ; 97.2)                    |
| 3 <sup>rd</sup> month after the second dose            | 1,106                             | 138,393      | 3,547                                | 135,952      | 76.3<br>(74.3 ; 78.1)                    | 29                                                                   | 5,106        | 267                                  | 4,868        | 94.4<br>(90.5 ; 96.8)                    |
| 4 <sup>th</sup> month after the second dose            | 657                               | 138,056      | 1,398                                | 137,315      | 61.6<br>(57.3 ; 65.6)                    | 13                                                                   | 5,079        | 83                                   | 5,009        | 86.4<br>(74.5 ; 92.8)                    |
| 5 <sup>th</sup> month after the second dose            | 700                               | 138,016      | 1,073                                | 137,643      | 48.8<br>(42.1 ; 54.6)                    | 6                                                                    | 5,063        | 52                                   | 5,017        | 93.9<br>(80.4 ; 98.1)                    |
| 6 <sup>th</sup> month after the second dose            | 576                               | 137,980      | 784                                  | 137,772      | 41.6<br>(32.5 ; 49.4)                    | 8                                                                    | 5,047        | 39                                   | 5,016        | 91.2<br>(71.3 ; 97.3)                    |
| 7 <sup>th</sup> month or greater after the second dose | 201                               | 137,991      | 314                                  | 137,878      | 49.6<br>(36.9 ; 59.7)                    | 8                                                                    | 5,051        | 19                                   | 5,042        | 60.0<br>(-3.1 ; 84.5)                    |

Abbreviations: CI, confidence interval; PCR, polymerase chain reaction.

\*In each analysis for a specific time-since-vaccination stratum, we included only those vaccinated in this specific time-since-vaccination stratum and those unvaccinated. Only matched pairs of PCR-positive and PCR-negative persons, in which both members of the pair were either unvaccinated or fell within each time-since-vaccination stratum have been included in the corresponding vaccine effectiveness estimate. Thus, the number of cases (and controls) varied across time-since-vaccination analyses.

<sup>†</sup>Cases and controls were matched one-to-one by sex, 10-year age group, nationality, reason for PCR testing, and calendar week of PCR test.

<sup>‡</sup>Vaccine effectiveness was estimated using the test-negative, case-control study design.<sup>13,14</sup>

<sup>§</sup>Severity,<sup>5</sup> criticality,<sup>5</sup> and fatality<sup>4</sup> were defined as per World Health Organization guidelines.

**Table S9. Sensitivity analysis in which study inclusion and exclusion criteria were modified so as to additionally include as controls persons who had a PCR-negative test during the study, in addition to their PCR-positive test during the study. That is, persons with both PCR-positive and PCR-negative tests during the study, January 1, 2021 to September 5, 2021, were included both as cases and as controls, but at different time points. Effectiveness of the BNT162b2 vaccine against any SARS-CoV-2 infection and against any severe, critical, or fatal COVID-19 disease.**

| Sub-studies*                                           | Effectiveness against infection      |              |                                         |              |                                                | Effectiveness against hospitalization and death                         |              |                                         |              |                                                |
|--------------------------------------------------------|--------------------------------------|--------------|-----------------------------------------|--------------|------------------------------------------------|-------------------------------------------------------------------------|--------------|-----------------------------------------|--------------|------------------------------------------------|
|                                                        | Cases <sup>†</sup><br>(PCR-positive) |              | Controls <sup>†</sup><br>(PCR-negative) |              | Effectiveness<br>in %<br>(95% CI) <sup>‡</sup> | Cases <sup>†</sup><br>(Severe, critical, or fatal disease) <sup>§</sup> |              | Controls <sup>†</sup><br>(PCR-negative) |              | Effectiveness<br>in %<br>(95% CI) <sup>‡</sup> |
|                                                        | Vaccinated                           | Unvaccinated | Vaccinated                              | Unvaccinated |                                                | Vaccinated                                                              | Unvaccinated | Vaccinated                              | Unvaccinated |                                                |
| 0-13 days after first dose                             | 4,480                                | 115,794      | 3,893                                   | 116,381      | -17.2<br>(-22.6 ; -11.9)                       | 262                                                                     | 4,041        | 230                                     | 4,073        | -15.8<br>(-39.8 ; 4.0)                         |
| ≥14 days after first dose and no second dose           | 2,530                                | 116,239      | 3,813                                   | 114,956      | 36.5<br>(33.0 ; 39.7)                          | 106                                                                     | 4,067        | 282                                     | 3,891        | 65.9<br>(56.8 ; 73.1)                          |
| 1 <sup>st</sup> month after the second dose            | 3,021                                | 117,009      | 9,418                                   | 110,612      | 74.1<br>(72.8 ; 75.2)                          | 33                                                                      | 4,092        | 508                                     | 3,617        | 95.0<br>(92.5 ; 96.7)                          |
| 2 <sup>nd</sup> month after the second dose            | 1,532                                | 116,309      | 3,946                                   | 113,895      | 68.0<br>(65.8 ; 70.1)                          | 25                                                                      | 4,095        | 267                                     | 3,853        | 94.9<br>(91.1 ; 97.1)                          |
| 3 <sup>rd</sup> month after the second dose            | 841                                  | 116,025      | 1,919                                   | 114,947      | 62.8<br>(59.2 ; 66.0)                          | 17                                                                      | 4,083        | 165                                     | 3,935        | 93.1<br>(87.3 ; 96.2)                          |
| 4 <sup>th</sup> month after the second dose            | 508                                  | 115,832      | 770                                     | 115,570      | 41.2<br>(33.2 ; 48.3)                          | 10                                                                      | 4,039        | 39                                      | 4,010        | 80.6<br>(56.3 ; 91.3)                          |
| 5 <sup>th</sup> month after the second dose            | 570                                  | 115,771      | 633                                     | 115,708      | 14.5<br>(1.8 ; 25.5)                           | 1                                                                       | 4,044        | 26                                      | 4,019        | 96.2<br>(71.7-99.5)                            |
| 6 <sup>th</sup> month after the second dose            | 477                                  | 115,781      | 509                                     | 115,749      | 11.0<br>(-5.2 ; 24.8)                          | 7                                                                       | 4,038        | 21                                      | 4,024        | 87.5<br>(45.6 ; 97.1)                          |
| 7 <sup>th</sup> month or greater after the second dose | 141                                  | 115,749      | 150                                     | 115,740      | 8.5<br>(-20.5 ; 30.5)                          | 6                                                                       | 4,039        | 9                                       | 4,036        | 42.9<br>(-95.2 ; 83.3)                         |

Abbreviations: CI, confidence interval; PCR, polymerase chain reaction.

<sup>†</sup>In each analysis for a specific time-since-vaccination stratum, we included only those vaccinated in this specific time-since-vaccination stratum and those unvaccinated. Only matched pairs of PCR-positive and PCR-negative persons where both members of the pair were either unvaccinated or fell within each time-since-vaccination stratum have been included in the corresponding vaccine effectiveness estimate. Thus, the number of cases (and controls) varied across time-since-vaccination analyses.

<sup>‡</sup>Cases and controls were matched one-to-one by sex, 10-year age group, nationality, reason for PCR testing, and calendar week of PCR test.

<sup>§</sup>Vaccine effectiveness was estimated using the test-negative, case-control study design.<sup>13,14</sup>

<sup>§</sup>Severity,<sup>5</sup> criticality,<sup>5</sup> and fatality<sup>4</sup> were defined as per World Health Organization guidelines.

**Table S10. Sensitivity analysis in which study inclusion and exclusion criteria were modified so as to additionally include all PCR testing done for pre-travel or at port of entry purposes. Effectiveness of the BNT162b2 vaccine against any SARS-CoV-2 infection and against any severe, critical, or fatal COVID-19 disease. Inclusion of this testing appears to introduce a negative bias, possibly because this testing could have been affected by different test-seeking behaviors of those vaccinated versus those unvaccinated, as a consequence of the travel privileges granted only to vaccinated persons, such as exemption from quarantine. This bias specifically affected the time-since-vaccination estimates of  $\geq 5$  months after the second dose, as incidence in these time-since-vaccination categories coincided with the summer travel season.**

| Sub-studies*                                              | Effectiveness against infection      |              |                                         |              |                                                | Effectiveness against hospitalization and death                         |              |                                         |              |                                                |
|-----------------------------------------------------------|--------------------------------------|--------------|-----------------------------------------|--------------|------------------------------------------------|-------------------------------------------------------------------------|--------------|-----------------------------------------|--------------|------------------------------------------------|
|                                                           | Cases <sup>†</sup><br>(PCR-positive) |              | Controls <sup>†</sup><br>(PCR-negative) |              | Effectiveness<br>in %<br>(95% CI) <sup>‡</sup> | Cases <sup>†</sup><br>(Severe, critical, or fatal disease) <sup>§</sup> |              | Controls <sup>†</sup><br>(PCR-negative) |              | Effectiveness<br>in %<br>(95% CI) <sup>‡</sup> |
|                                                           | Vaccinated                           | Unvaccinated | Vaccinated                              | Unvaccinated |                                                | Vaccinated                                                              | Unvaccinated | Vaccinated                              | Unvaccinated |                                                |
| 0-13 days after first dose                                | 4,199                                | 141,811      | 4,007                                   | 142,003      | -5.4<br>(-10.4 ; -0.7)                         | 250                                                                     | 4,023        | 292                                     | 3,981        | 15.8<br>(-0.6 ; 29.6)                          |
| $\geq 14$ days after first dose<br>and no second dose     | 2,387                                | 142,207      | 3,668                                   | 140,926      | 37.7<br>(34.2 ; 41.0)                          | 101                                                                     | 4,054        | 309                                     | 3,846        | 71.2<br>(63.3 ; 77.4)                          |
| 1 <sup>st</sup> month after the second<br>dose            | 3,302                                | 143,905      | 11,041                                  | 136,166      | 77.4<br>(76.4 ; 78.5)                          | 33                                                                      | 4,120        | 616                                     | 3,537        | 96.5<br>(94.6 ; 97.7)                          |
| 2 <sup>nd</sup> month after the second<br>dose            | 1,738                                | 142,649      | 4,764                                   | 139,623      | 71.0<br>(69.1 ; 72.8)                          | 22                                                                      | 4,085        | 316                                     | 3,791        | 96.1<br>(93.0 ; 97.8)                          |
| 3 <sup>rd</sup> month after the second<br>dose            | 1,105                                | 142,097      | 2,310                                   | 140,892      | 59.4<br>(56.0 ; 62.6)                          | 18                                                                      | 4,052        | 173                                     | 3,897        | 93.4<br>(87.8 ; 96.4)                          |
| 4 <sup>th</sup> month after the second<br>dose            | 808                                  | 141,700      | 961                                     | 141,547      | 19.8<br>(10.8 ; 27.8)                          | 7                                                                       | 4,022        | 56                                      | 3,973        | 92.5<br>(79.1 ; 97.3)                          |
| 5 <sup>th</sup> month after the second<br>dose            | 933                                  | 141,678      | 826                                     | 141,785      | -19.3<br>(-33.6 ; -6.6)                        | 2                                                                       | 3,997        | 28                                      | 3,971        | 96.3<br>(72.7-99.5)                            |
| 6 <sup>th</sup> month after the second<br>dose            | 737                                  | 141,642      | 585                                     | 141,794      | -45.9<br>(-67.8 ; -26.9)                       | 7                                                                       | 4,001        | 14                                      | 3,994        | 77.8<br>(-2.8 ; 95.2)                          |
| 7 <sup>th</sup> month or greater after<br>the second dose | 220                                  | 141,617      | 153                                     | 141,684      | -75.2<br>(-127.4 ; -35.1)                      | 6                                                                       | 3,996        | 9                                       | 3,993        | 42.9<br>(-95.2 ; 83.3)                         |

Abbreviations: CI, confidence interval; PCR, polymerase chain reaction.

<sup>†</sup>In each analysis for a specific time-since-vaccination stratum, we included only those vaccinated in this specific time-since-vaccination stratum and those unvaccinated. Only matched pairs of PCR-positive and PCR-negative persons, in which both members of the pair were either unvaccinated or fell within each time-since-vaccination stratum have been included in the corresponding vaccine effectiveness estimate. Thus, the number of cases (and controls) varied across time-since-vaccination analyses.

<sup>‡</sup>Cases and controls were matched one-to-one by sex, 10-year age group, nationality, reason for PCR testing, and calendar week of PCR test.

<sup>§</sup>Vaccine effectiveness was estimated using the test-negative, case-control study design.<sup>13,14</sup>

<sup>§</sup>Severity,<sup>5</sup> criticality,<sup>5</sup> and fatality<sup>4</sup> were defined as per World Health Organization guidelines.

**Table S11. Effectiveness of the BNT162b2 vaccine against any SARS-CoV-2 infection, symptomatic SARS-CoV-2 infection, or asymptomatic SARS-CoV-2 infection, with effectiveness estimated using a multivariable logistic regression analysis of associations with a PCR-positive test, January 1, 2021 to September 5, 2021, adjusting for sex, age, nationality, reason for PCR testing, and calendar week of PCR test\*.**

|                                                        | Original sample size | SARS-CoV-2 positive | Multivariable regression analysis | Vaccine effectiveness  |
|--------------------------------------------------------|----------------------|---------------------|-----------------------------------|------------------------|
|                                                        | N (%)                | N (%)               | AOR (95% CI)                      | % (95% CI)             |
| <b>Any SARS-CoV-2 infection</b>                        |                      |                     |                                   |                        |
| Unvaccinated                                           | 806,169 (81.4)       | 126,242 (15.7)      | 1.00                              |                        |
| 0-13 days after first dose                             | 23,382 (2.4)         | 5,088 (21.8)        | 1.05 (1.02-1.09)                  | -5.3 (-9.0 ; -1.7)     |
| ≥14 days after first dose and no second dose           | 16,578 (1.7)         | 2,897 (17.5)        | 0.67 (0.65-0.70)                  | 32.5 (29.5 ; 35.4)     |
| 1 <sup>st</sup> month after the second dose            | 58,187 (5.9)         | 3,296 (5.7)         | 0.22 (0.21-0.23)                  | 78.0 (77.1 ; 78.8)     |
| 2 <sup>nd</sup> month after the second dose            | 31,702 (3.2)         | 1,758 (5.5)         | 0.29 (0.27-0.30)                  | 71.4 (69.9 ; 72.8)     |
| 3 <sup>rd</sup> month after the second dose            | 21,717 (2.2)         | 1,007 (4.6)         | 0.36 (0.33-0.38)                  | 64.3 (61.9 ; 66.7)     |
| 4 <sup>th</sup> month after the second dose            | 12,471 (1.3)         | 593 (4.8)           | 0.59 (0.54-0.64)                  | 41.3 (36.0 ; 46.1)     |
| 5 <sup>th</sup> month after the second dose            | 9,414 (1.0)          | 680 (7.2)           | 1.11 (1.03-1.21)                  | -11.4 (-21.1 ; -2.5)   |
| 6 <sup>th</sup> month after the second dose            | 8,897 (0.9)          | 558 (6.3)           | 1.21 (1.10-1.33)                  | -20.6 (-32.5 ; -9.8)   |
| 7 <sup>th</sup> month or greater after the second dose | 2,023 (0.2)          | 181 (8.9)           | 1.43 (1.22-1.68)                  | -43.4 (-68.3 ; -22.1)  |
| <b>Symptomatic SARS-CoV-2 infection<sup>†</sup></b>    |                      |                     |                                   |                        |
| Unvaccinated                                           | 158,926 (80.3)       | 48,943 (30.8)       | 1.00                              |                        |
| 0-13 days after first dose                             | 6,352 (3.2)          | 2,630 (41.4)        | 1.04 (0.99-1.10)                  | -4.3 (-10.2 ; 1.2)     |
| ≥14 days after first dose and no second dose           | 5,523 (2.8)          | 1,486 (26.9)        | 0.53 (0.50-0.57)                  | 46.8 (43.2 ; 50.1)     |
| 1 <sup>st</sup> month after the second dose            | 8,719 (4.4)          | 1,100 (12.6)        | 0.18 (0.17-0.20)                  | 81.6 (80.3 ; 82.8)     |
| 2 <sup>nd</sup> month after the second dose            | 6,011 (3.0)          | 840 (14.0)          | 0.29 (0.26-0.31)                  | 71.4 (69.1 ; 73.6)     |
| 3 <sup>rd</sup> month after the second dose            | 4,862 (2.5)          | 488 (10.0)          | 0.34 (0.31-0.38)                  | 66.1 (62.5 ; 69.3)     |
| 4 <sup>th</sup> month after the second dose            | 3,167 (1.6)          | 307 (9.7)           | 0.57 (0.50-0.64)                  | 43.5 (36.0 ; 50.1)     |
| 5 <sup>th</sup> month after the second dose            | 2,386 (1.2)          | 381 (16)            | 1.27 (1.13-1.43)                  | -26.9 (-42.6 ; -13.0)  |
| 6 <sup>th</sup> month after the second dose            | 1,466 (0.7)          | 277 (18.9)          | 1.66 (1.44-1.90)                  | -65.5 (-90.3 ; -44.0)  |
| 7 <sup>th</sup> month or greater after the second dose | 571 (0.3)            | 94 (16.5)           | 1.38 (1.10-1.73)                  | -37.7 (-73.1 ; -9.6)   |
| <b>Asymptomatic SARS-CoV-2 infection<sup>‡</sup></b>   |                      |                     |                                   |                        |
| Unvaccinated                                           | 325341 (81.8)        | 28094 (8.6)         | 1.00                              |                        |
| 0-13 days after first dose                             | 9003 (2.3)           | 1021 (11.3)         | 1.12 (1.04-1.20)                  | -11.8 (-19.8 ; -4.3)   |
| ≥14 days after first dose and no second dose           | 5505 (1.4)           | 546 (9.9)           | 0.90 (0.82-0.99)                  | 9.9 (1.1 ; 17.8)       |
| 1 <sup>st</sup> month after the second dose            | 21643 (5.4)          | 818 (3.8)           | 0.28 (0.26-0.30)                  | 71.7 (69.5 ; 73.7)     |
| 2 <sup>nd</sup> month after the second dose            | 12517 (3.1)          | 418 (3.3)           | 0.38 (0.35-0.42)                  | 61.7 (57.5 ; 65.5)     |
| 3 <sup>rd</sup> month after the second dose            | 9270 (2.3)           | 266 (2.9)           | 0.59 (0.52-0.67)                  | 41.4 (33.3 ; 48.5)     |
| 4 <sup>th</sup> month after the second dose            | 4737 (1.2)           | 130 (2.7)           | 0.89 (0.75-1.07)                  | 10.6 (-7.1 ; 25.4)     |
| 5 <sup>th</sup> month after the second dose            | 3575 (0.9)           | 120 (3.4)           | 1.12 (0.92-1.36)                  | -12.2 (-36.2 ; 7.5)    |
| 6 <sup>th</sup> month after the second dose            | 5242 (1.3)           | 140 (2.7)           | 0.80 (0.65-0.98)                  | 20.0 (2.1 ; 34.7)      |
| 7 <sup>th</sup> month or greater after the second dose | 731 (0.2)            | 41 (5.6)            | 1.83 (1.32-2.55)                  | -83.2 (-155.1 ; -31.6) |

Abbreviations: AOR: adjusted odds ratio; CI, confidence interval.

\*In this table vaccine effectiveness was estimated using the equation  $1 - \text{AOR}$ , that is assuming odds ratio approximates risk ratio for rare outcomes. The AORs were derived using a multivariable logistic regression analysis of the associations with a PCR-positive test, that is by applying a different method from that of the main analysis of matched test-negative, case-control study design. The full unmatched sample of this study was used in this analysis, that is 142,300 individuals with a first PCR-positive test and 848,240 individuals with a first PCR-negative test. The multivariable logistic regression adjusted for sex (male, female), age (0-9, 10-19, 20-29, 30-39, 40-49, 50-59, 60-69, and 70+ years), nationality (Bangladeshis, Egyptians, Filipinos, Indians, Nepalese, Pakistani, Qataris, Sri Lankans, Sudanese, and other nationalities), reason for PCR testing (clinical suspicion, contact tracing, healthcare routine testing, survey, individual request, and other), and calendar week of PCR test starting from January 1, 2021.

<sup>†</sup>A symptomatic infection was defined as a PCR-positive test conducted because of clinical suspicion due to presence of symptoms compatible with a respiratory tract infection.

<sup>‡</sup>An asymptomatic infection was defined as a PCR-positive test conducted with no reported presence of symptoms compatible with a respiratory tract infection. That is, the PCR testing was done as part of a survey or a random testing campaign.

## References

1. Abu-Raddad LJ, Chemaitelly H, Ayoub HH, et al. Characterizing the Qatar advanced-phase SARS-CoV-2 epidemic. *Scientific Reports* 2021;11:6233.
2. Planning and Statistics Authority-State of Qatar. Qatar Monthly Statistics. Available from: <https://www.psa.gov.qa/en/pages/default.aspx>. Accessed on: May 26, 2020. 2020.
3. Bertollini R, Chemaitelly H, Yassine HM, Al-Thani MH, Al-Khal A, Abu-Raddad LJ. Associations of Vaccination and of Prior Infection With Positive PCR Test Results for SARS-CoV-2 in Airline Passengers Arriving in Qatar. *JAMA* 2021.
4. World Health Organization. International guidelines for certification and classification (coding) of COVID-19 as cause of death. Available from: [https://www.who.int/classifications/icd/Guidelines\\_Cause\\_of\\_Death\\_COVID-19-20200420-EN.pdf?ua=1](https://www.who.int/classifications/icd/Guidelines_Cause_of_Death_COVID-19-20200420-EN.pdf?ua=1). Document Number: WHO/HQ/DDI/DNA/CAT. Accessed on May 31, 2021. 2021.
5. World Health Organization. COVID-19 clinical management: living guidance. Available from: <https://www.who.int/publications/i/item/WHO-2019-nCoV-clinical-2021-1>. Accessed on: May 15 2021. 2021.
6. Qatar viral genome sequencing data. Data on randomly collected samples. <https://www.gisaid.org/phylogenetics/global/nextstrain/>. 2021. at <https://www.gisaid.org/phylogenetics/global/nextstrain/>.
7. Benslimane FM, Al Khatib HA, Al-Jamal O, et al. One year of SARS-CoV-2: Genomic characterization of COVID-19 outbreak in Qatar. *medRxiv* 2021:2021.05.19.21257433.
8. Hasan MR, Kalikiri MKR, Mirza F, et al. Real-Time SARS-CoV-2 Genotyping by High-Throughput Multiplex PCR Reveals the Epidemiology of the Variants of Concern in Qatar. *medRxiv* 2021:2021.07.18.21260718.
9. Abu-Raddad LJ, Chemaitelly H, Butt AA, National Study Group for Covid-19 Vaccination. Effectiveness of the BNT162b2 Covid-19 Vaccine against the B.1.1.7 and B.1.351 Variants. *N Engl J Med* 2021.
10. Chemaitelly H, Yassine HM, Benslimane FM, et al. mRNA-1273 COVID-19 vaccine effectiveness against the B.1.1.7 and B.1.351 variants and severe COVID-19 disease in Qatar. *Nat Med* 2021.
11. Multiplexed RT-qPCR to screen for SARS-COV-2 B.1.1.7, B.1.351, and P.1 variants of concern V.3. [dx.doi.org/10.17504/protocols.io.br9vm966](https://doi.org/10.17504/protocols.io.br9vm966). 2021. (Accessed June 6, 2021, at <https://www.protocols.io/view/multiplexed-rt-qpcr-to-screen-for-sars-cov-2-b-1-1-br9vm966>.)
12. World Health Organization. Tracking SARS-CoV-2 variants. Available from: <https://www.who.int/en/activities/tracking-SARS-CoV-2-variants/>. Accessed on: June 5, 2021. 2021.
13. Jackson ML, Nelson JC. The test-negative design for estimating influenza vaccine effectiveness. *Vaccine* 2013;31:2165-8.
14. Verani JR, Baqui AH, Broome CV, et al. Case-control vaccine effectiveness studies: Preparation, design, and enrollment of cases and controls. *Vaccine* 2017;35:3295-302.
